# Supplementary material for: Pharmacokinetics and Nephrotoxicity of Polymyxin MRX-8 in Rats: A Novel Agent against Resistant Gram-Negative Bacteria
Source: MDPI journal article supplement (doi:10.3390/antibiotics13040354), 2024-04-12
Supplement: s1 [file s1]

# Pharmacokinetics and Nephrotoxicity of Polymyxin MRX-8 in Rats: A Novel Agent against Resistant Gram-Negative Bacteria

Xingyi Qu<sup>1,2,3</sup>, Chenxue Guo<sup>1,2,3</sup>, Shaojun Liu<sup>4</sup>, Xin Li<sup>1,2,3</sup>, Lin Xi<sup>1,2,3</sup>, Xiaofen Liu<sup>1,2,3,\*</sup> and Jing Zhang<sup>1,2,3,5,\*</sup>

<sup>1</sup> Institute of Antibiotics, Huashan Hospital, Fudan University, Shanghai 200040, China;

20111030085@fudan.edu.cn (X.Q.); 20211220020@fudan.edu.cn (C.G.); lixin@huashan.org.cn (X.L.);

22211220011@m.fudan.edu.cn (L.X.)

<sup>2</sup> Key Laboratory of Clinical Pharmacology of Antibiotics, Shanghai 200040, China

<sup>3</sup> National Health Commission & National Clinical Research Center for Aging and Medicine, Huashan Hospital, Fudan University, Shanghai 200040, China

<sup>4</sup> Division of Nephrology, Huashan Hospital, Fudan University, Shanghai 200052, China;

liushaojun@fudan.edu.cn (S.L.)

<sup>5</sup> Clinical Pharmacology Center, Huashan Hospital, Fudan University, Shanghai 200437, China

\* Correspondence: xiaofenliu@fudan.edu.cn (X.L.); zhangj61@fudan.edu.cn (J.Z.); Tel.: +86-21-5288-8190 (J.Z.)

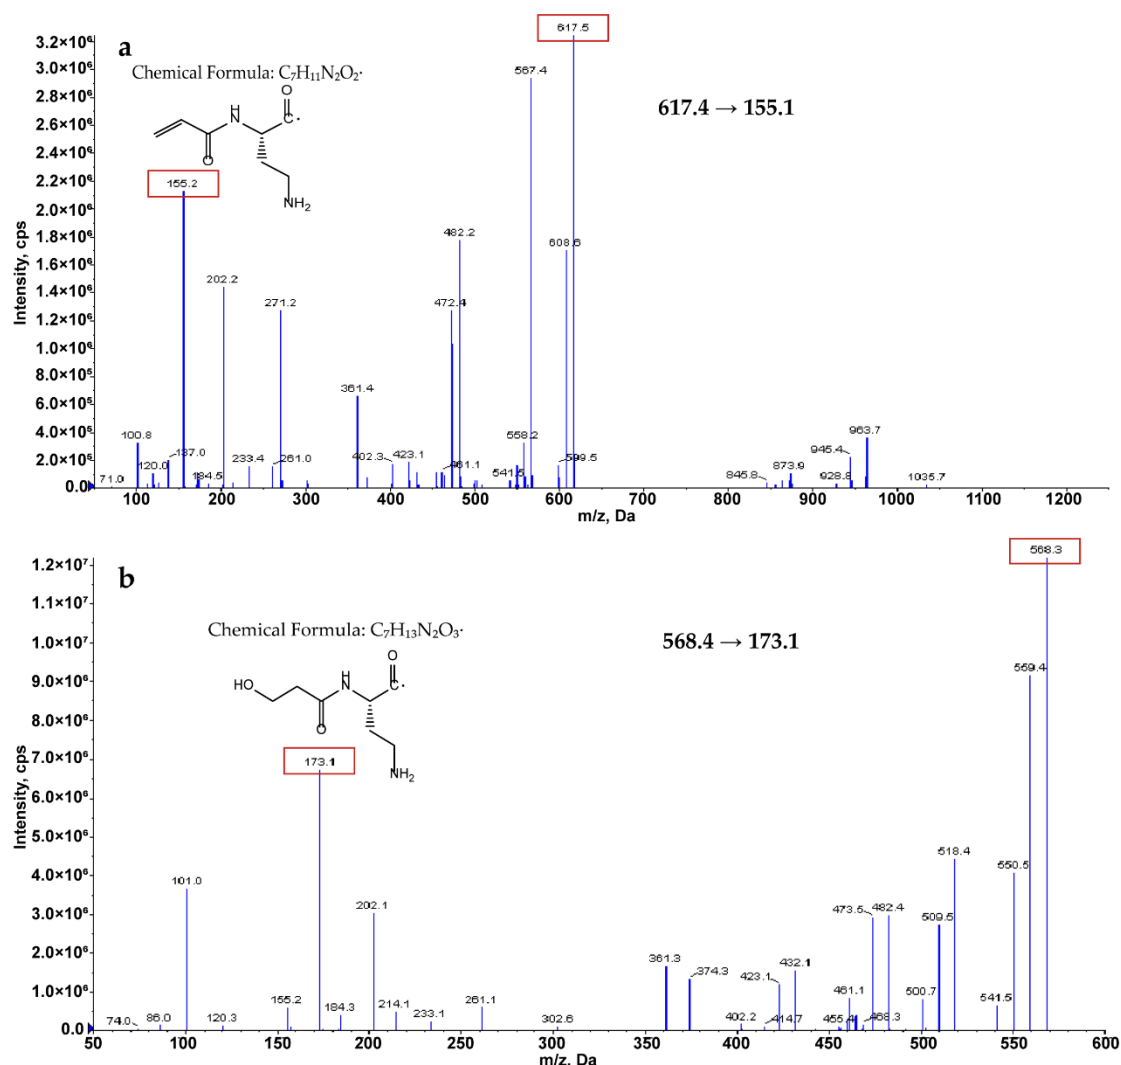

**Figure S1.** The product ion mass spectra and potential fracture modes of MRX-8 (a) and MRX-8039 (b).

**Table S1.** Gradient elution procedures in liquid chromatography.

| Time<br>(min) | 2 mM ammonium acetate<br>solution with 0.1% formic acid | acetonitrile solution with<br>0.1% formic acid |
|---------------|---------------------------------------------------------|------------------------------------------------|
| 0             | 90%                                                     | 10%                                            |
| 0.3           | 90%                                                     | 10%                                            |
| 1.8           | 35%                                                     | 65%                                            |
| 2.8           | 10%                                                     | 90%                                            |
| 3.3           | 10%                                                     | 90%                                            |
| 3.4           | 90%                                                     | 10%                                            |
| 4.0           | 90%                                                     | 10%                                            |

**Table S2.** The extraction recovery and IS normalized matrix effect of MRX-8 and MRX-8039 in rat plasma.

| Samples type*                | MRX-8    |          |          | MRX-8039  |           |          |
|------------------------------|----------|----------|----------|-----------|-----------|----------|
|                              | QCL      | QCM      | QCH      | QCL       | QCM       | QCH      |
| Concentration (mg/L)         | 0.03     | 0.50     | 8.00     | 0.03      | 0.50      | 8.00     |
| Recovery (%)                 | 87.8±9.1 | 92.6±7.5 | 97.7±4.0 | 85.1±12.2 | 91.0±9.4  | 93.9±3.9 |
| Normalized matrix effect (%) | 81.2±8.7 | 94.8±7.3 | 94.6±2.0 | 44.5±12.2 | 50.9±11.8 | 63.3±8.3 |

\* Six replicas of each quality control sample were quantitated by the calibration curve concentration. The results were expressed as Mean ± RSD. RSD: relative standard deviation. Conc: Concentration.

**Table S3.** Stability of MRX-8 and MRX-8039 in rat plasma at different storage conditions.

| Samples type*                            | MRX-8     |           | MRX-8039  |           |
|------------------------------------------|-----------|-----------|-----------|-----------|
|                                          | QCL       | QCH       | QCL       | QCH       |
| Concentration (mg/L)                     | 0.03      | 8         | 0.03      | 8         |
| Initial concentrations (%)               | 101.0±4.6 | 99.5±6.7  | 99.1±7.9  | 96.2±5.2  |
| Freeze-thaw stability (%)                | 107.3±1.4 | 104.5±4.5 | 99.3±11.4 | 94.3±5.6  |
| Room temperature stability (8 hours) (%) | 99.5±6.2  | 97.3±3.6  | 96.8±9.9  | 105.4±3.0 |
| -20°C stability (42 days) (%)            | 96.2±9.6  | 99.9±2.4  | 92.6±6.7  | 97.2±6.5  |
| -70°C stability (42 days) (%)            | 97.2±6.4  | 94.2±3.7  | 107.0±6.0 | 96.4±2.6  |

\* Three replicas of each quality control sample were quantitated by the calibration curve concentration. The results were expressed as Mean ± RSD. RSD: relative standard deviation.
